# Supplementary material
Source: PubMed Central journal article supplement (PMC3902031)
Supplement: NIHMS541183-supplement-01.pdf [file NIHMS541183-supplement-01.pdf]

## Supporting Information

### New Insights into Molecular Recognition of 1,1-Bisphosphonic Acids by Farnesyl Pyrophosphate Synthase

Mariana Ferrer-Casal,<sup>a</sup> Catherine Li,<sup>b</sup> Melina Galizzi,<sup>b</sup> Carlos A. Stortz,<sup>c</sup> Sergio H. Szajnman,<sup>a</sup> Roberto Docampo,<sup>b</sup> Silvia N. J. Moreno,<sup>b</sup> and Juan B. Rodriguez<sup>a,\*</sup>

<sup>a</sup>*Departamento de Química Orgánica and UMYMFOR (CONICET–FCEyN), Facultad de Ciencias Exactas y Naturales, Universidad de Buenos Aires, Pabellón 2, Ciudad Universitaria, C1428EHA, Buenos Aires, Argentina,* <sup>b</sup>*Center for Tropical and Emerging Global Diseases and Department of Cellular Biology, University of Georgia, Athens, Georgia, 30602, USA,* <sup>c</sup>*Departamento de Química Orgánica and CIHIDECAR, Facultad de Ciencias Exactas y Naturales, Universidad de Buenos Aires, Pabellón 2, Ciudad Universitaria, C1428EHA, Buenos Aires, Argentina*

| List of Contents                                   | Page |
|----------------------------------------------------|------|
| <sup>1</sup> H NMR spectrum of compound <b>22</b>  | 3    |
| <sup>13</sup> C NMR spectrum of compound <b>22</b> | 3    |
| <sup>1</sup> H NMR spectrum of compound <b>27</b>  | 4    |
| <sup>13</sup> C NMR spectrum of compound <b>27</b> | 4    |
| <sup>31</sup> P NMR spectrum of compound <b>27</b> | 5    |
| <sup>1</sup> H NMR spectrum of compound <b>23</b>  | 5    |
| <sup>13</sup> C NMR spectrum of compound <b>23</b> | 6    |
| <sup>1</sup> H NMR spectrum of compound <b>28</b>  | 6    |
| <sup>13</sup> C NMR spectrum of compound <b>28</b> | 7    |
| <sup>31</sup> P NMR spectrum of compound <b>28</b> | 7    |
| <sup>1</sup> H NMR spectrum of compound <b>29</b>  | 8    |
| <sup>13</sup> C NMR spectrum of compound <b>29</b> | 8    |
| <sup>31</sup> P NMR spectrum of compound <b>29</b> | 9    |
| <sup>1</sup> H NMR spectrum of compound <b>25</b>  | 9    |
| <sup>13</sup> C NMR spectrum of compound <b>25</b> | 10   |
| <sup>1</sup> H NMR spectrum of compound <b>30</b>  | 10   |
| <sup>13</sup> C NMR spectrum of compound <b>30</b> | 11   |
| <sup>31</sup> P NMR spectrum of compound <b>30</b> | 11   |
| <sup>1</sup> H NMR spectrum of compound <b>26</b>  | 12   |
| <sup>13</sup> C NMR spectrum of compound <b>26</b> | 12   |
| <sup>1</sup> H NMR spectrum of compound <b>31</b>  | 13   |
| <sup>13</sup> C NMR spectrum of compound <b>31</b> | 13   |

|                                                                                                               |    |
|---------------------------------------------------------------------------------------------------------------|----|
| <sup>31</sup> P NMR spectrum of compound <b>31</b>                                                            | 14 |
| <sup>1</sup> H NMR spectrum of compound <b>28</b> in anhydrous DMSO- <i>d</i> <sub>6</sub>                    | 14 |
| <sup>1</sup> H NMR spectrum of compound <b>28</b> + Mg <sup>2+</sup> in anhydrous DMSO- <i>d</i> <sub>6</sub> | 15 |
| <sup>1</sup> H NMR spectrum of compound <b>33</b> in anhydrous DMSO- <i>d</i> <sub>6</sub>                    | 15 |
| <sup>1</sup> H NMR spectrum of compound <b>33</b> + Mg <sup>2+</sup> in anhydrous DMSO- <i>d</i> <sub>6</sub> | 16 |
| Cartesian coordinates of compounds <b>12a</b> and <b>27a</b>                                                  | 17 |

# MFJB41 #/CD3OD// 1H NMR

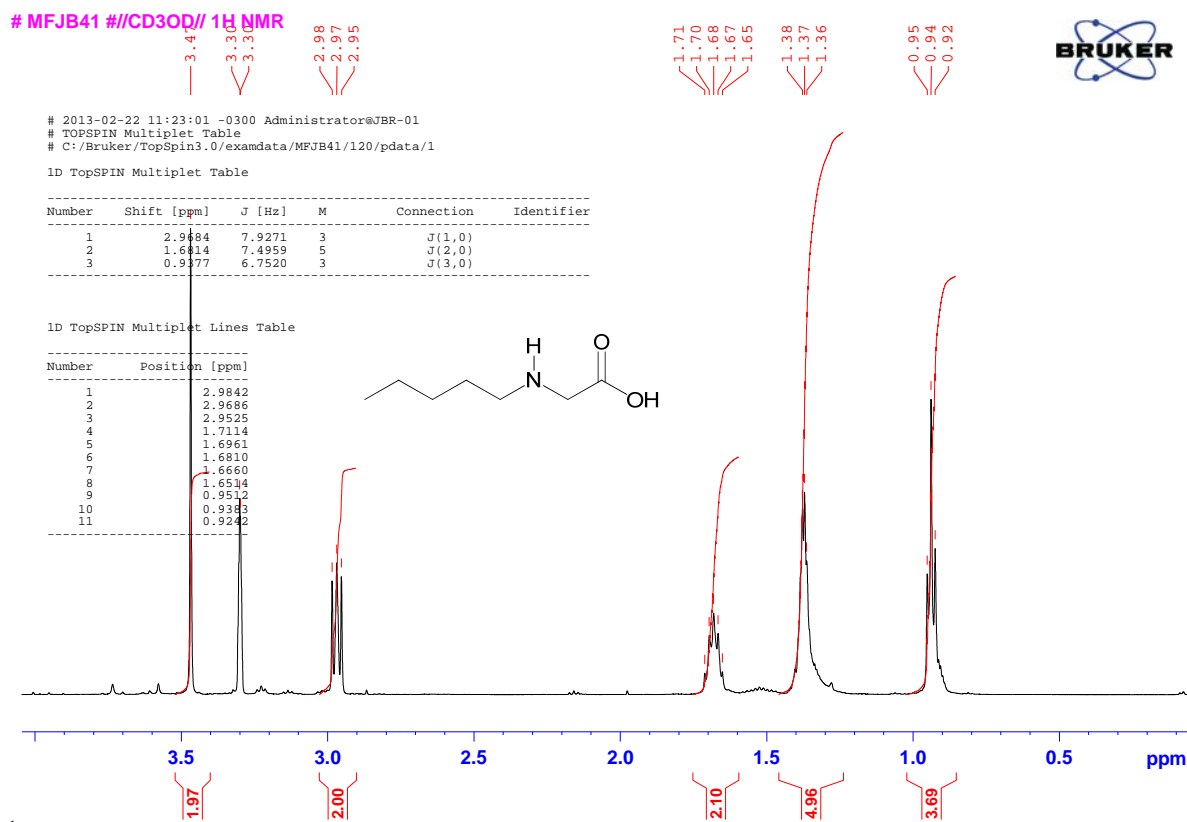

<sup>1</sup>H NMR spectrum of compound 22

# MFJB41 #/CD3OD// 13C NMR

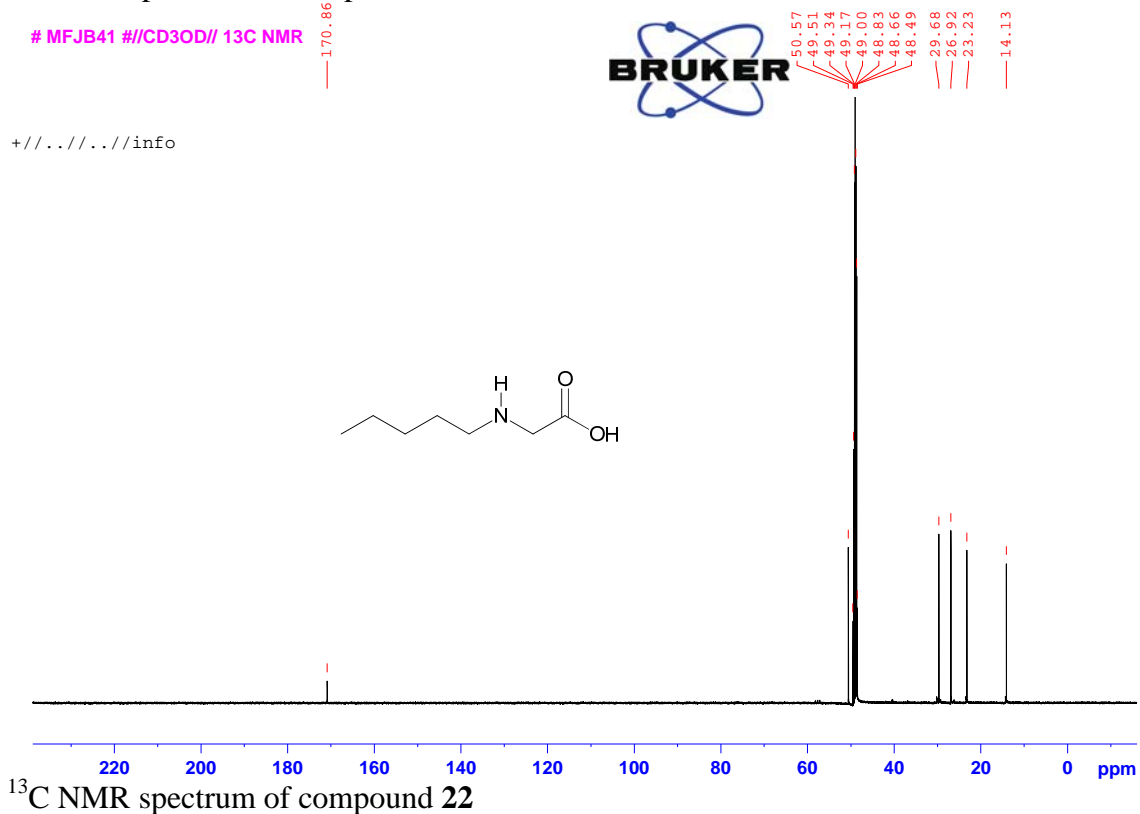

<sup>13</sup>C NMR spectrum of compound 22

MFJB42 /D2O/ <sup>1</sup>H NMR

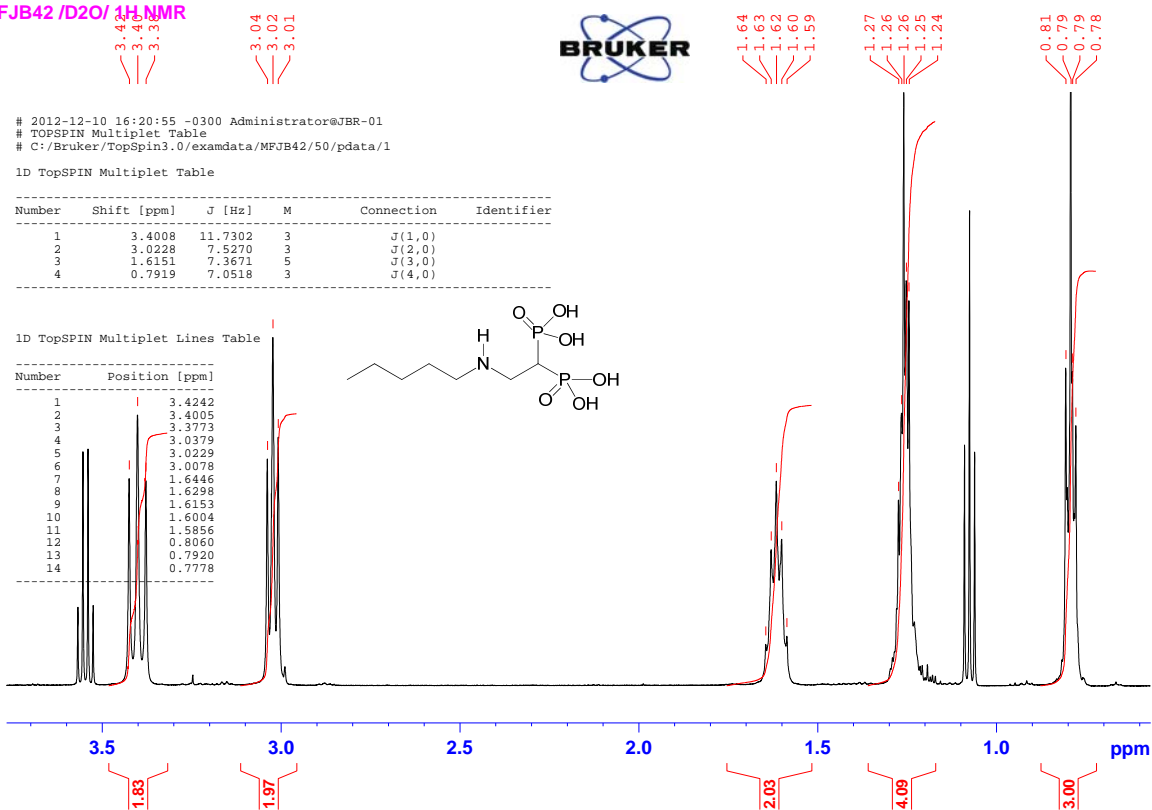

<sup>1</sup>H NMR spectrum of compound 27

MFJB42 C-5NH2 /D2O/ <sup>13</sup>C NMR

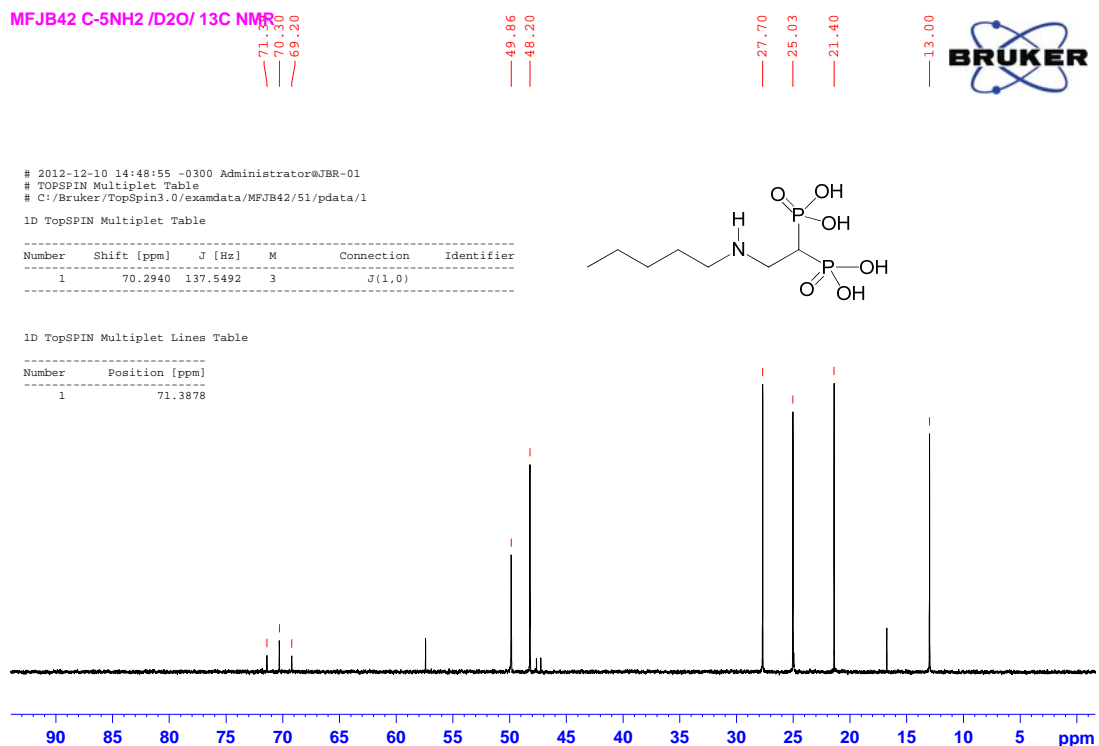

<sup>13</sup>C NMR spectrum of compound 27.

MFJB42 /D2O/ 31PNMR

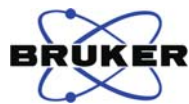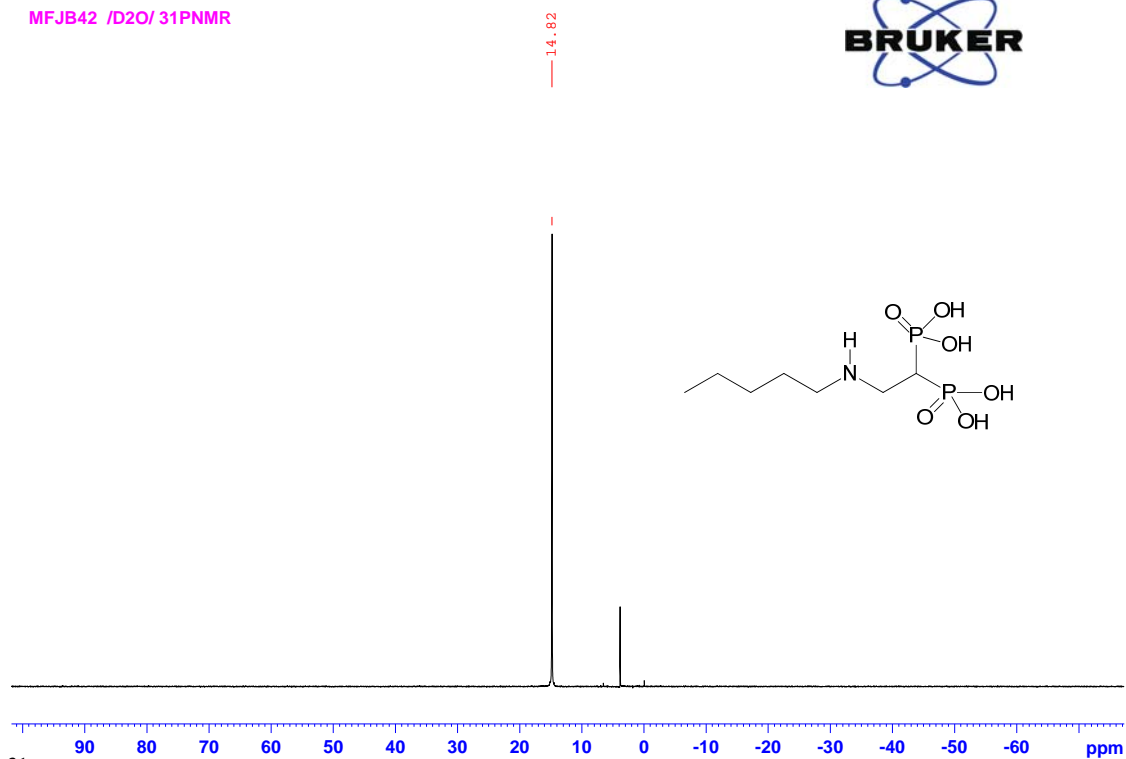

<sup>31</sup>P NMR spectrum of compound 27

MFJB19 1H NMR CD3OD

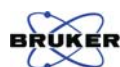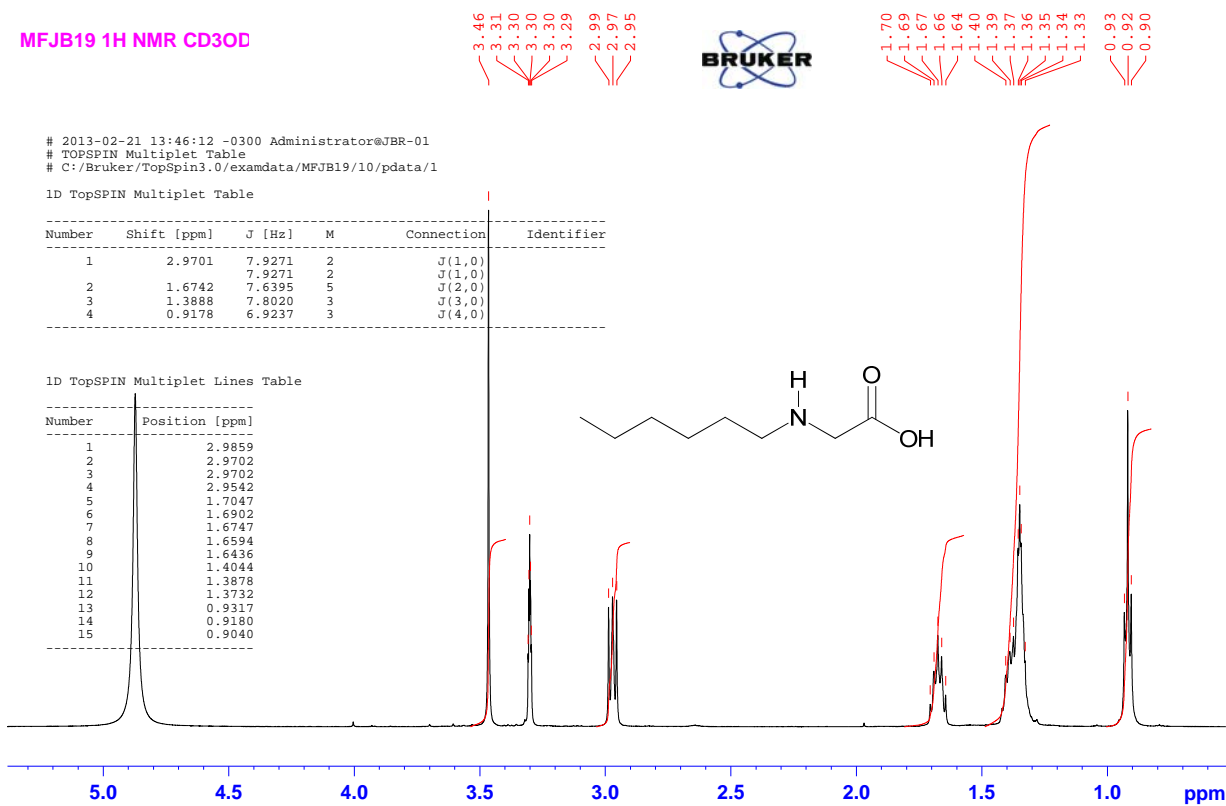

<sup>1</sup>H NMR spectrum of compound 23.

MFJB19 / CD3OD / <sup>13</sup>C NMR

+//...//info

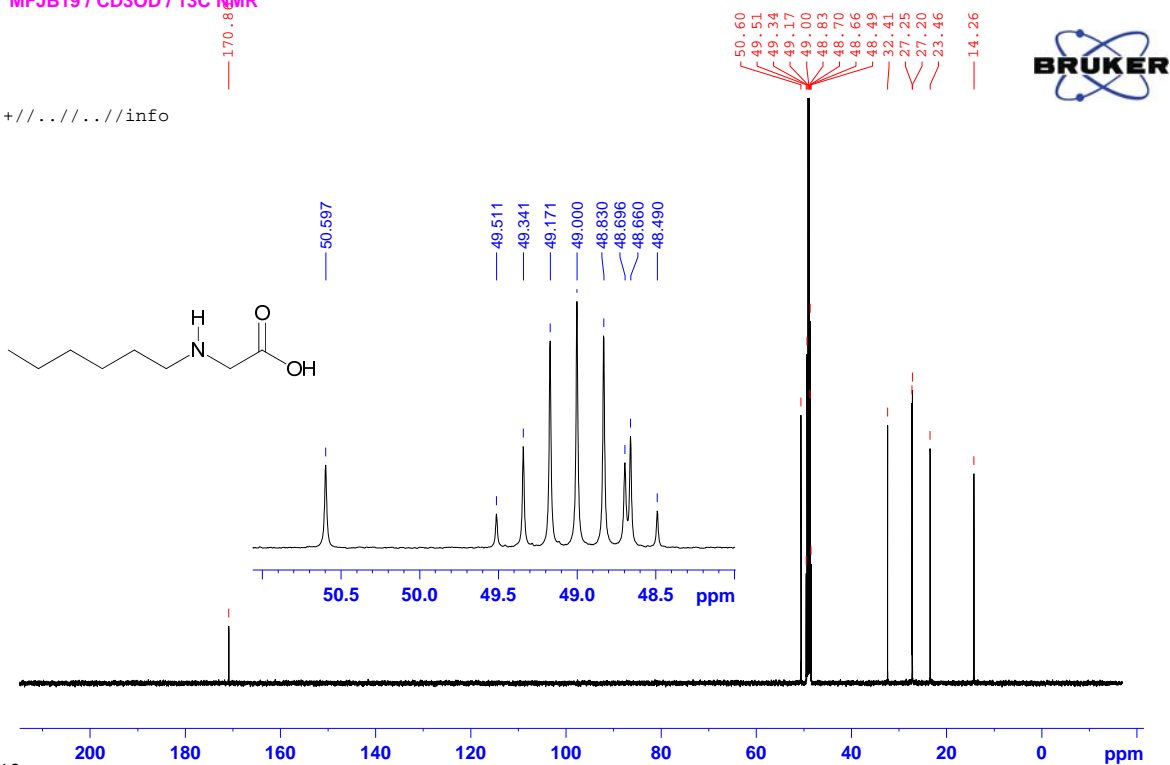

<sup>13</sup>C NMR spectrum of compound 23.

MFJB 21 / D2O / <sup>1</sup>H NMR.

# 2012-12-11 18:52:14 -0300 Administrator@JBR-01  
# TOPSPIN Multiplet Table  
# C:/Bruker/TopSpin3.0/examdata/MFJB21b/1/pdata/1

1D TopSPIN Multiplet Table

| Number | Shift [ppm] | J [Hz]  | M | Connection | Identifier |
|--------|-------------|---------|---|------------|------------|
| 1      | 3.3948      | 11.6280 | 3 | J(1,0)     |            |
| 2      | 3.0248      | 7.5270  | 3 | J(2,0)     |            |
| 3      | 1.6133      | 7.4959  | 5 | J(3,0)     |            |
| 4      | 1.2922      | 6.6475  | 5 | J(4,0)     |            |
| 5      | 0.7781      | 7.2098  | 3 | J(5,0)     |            |

1D TopSPIN Multiplet Lines Table

| Number | Position [ppm] |
|--------|----------------|
| 1      | 3.4180         |
| 2      | 3.3948         |
| 3      | 3.3715         |
| 4      | 3.0399         |
| 5      | 3.0250         |
| 6      | 3.0098         |
| 7      | 1.6432         |
| 8      | 1.6290         |
| 9      | 1.6135         |
| 10     | 1.5988         |
| 11     | 1.5833         |
| 12     | 1.5188         |
| 13     | 1.3085         |
| 14     | 1.2937         |
| 15     | 1.2781         |
| 16     | 1.2656         |
| 17     | 0.7925         |
| 18     | 0.7783         |
| 19     | 0.7636         |

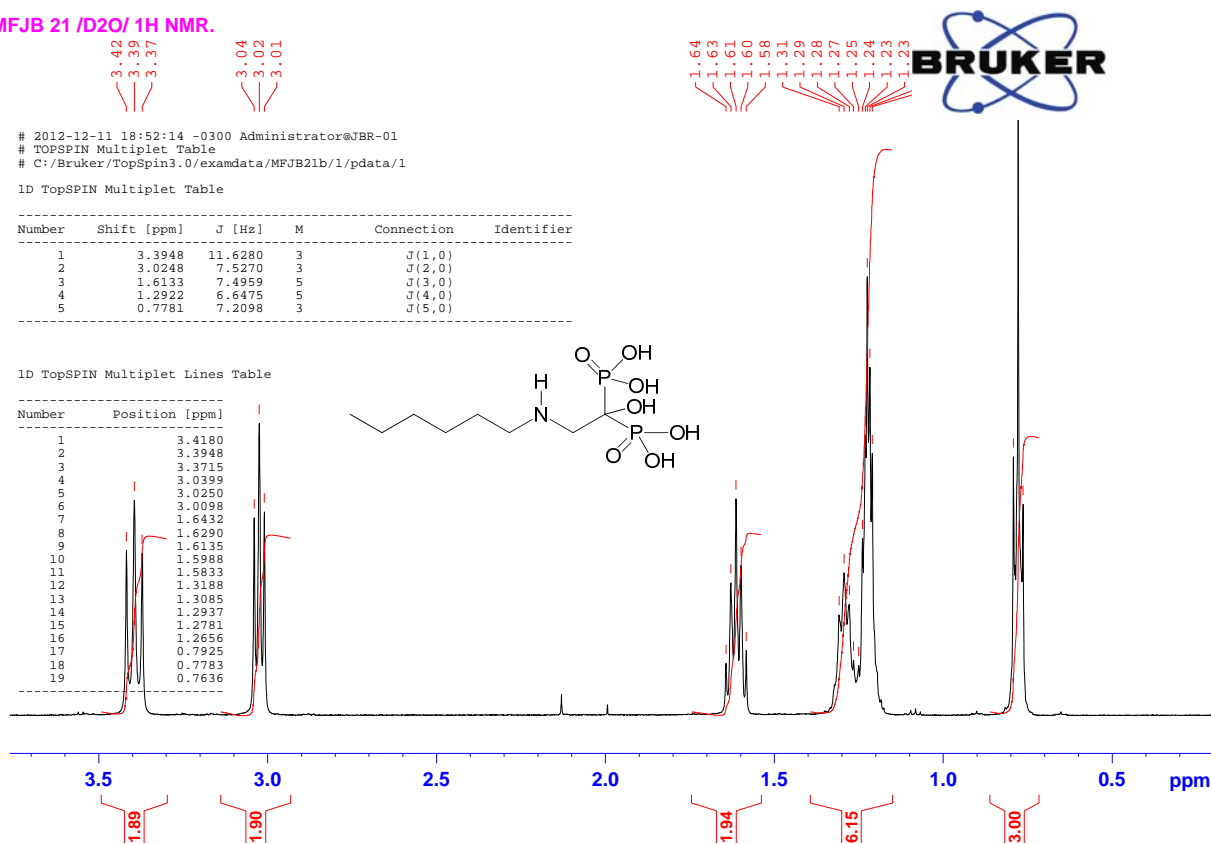

<sup>1</sup>H NMR spectrum of compound 28.

MFJB 21 /D2O/ 13C NMR

50.03  
48.17

30.36

25.34  
25.21

21.65

13.17

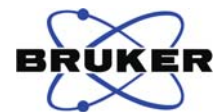

+//...//...//info

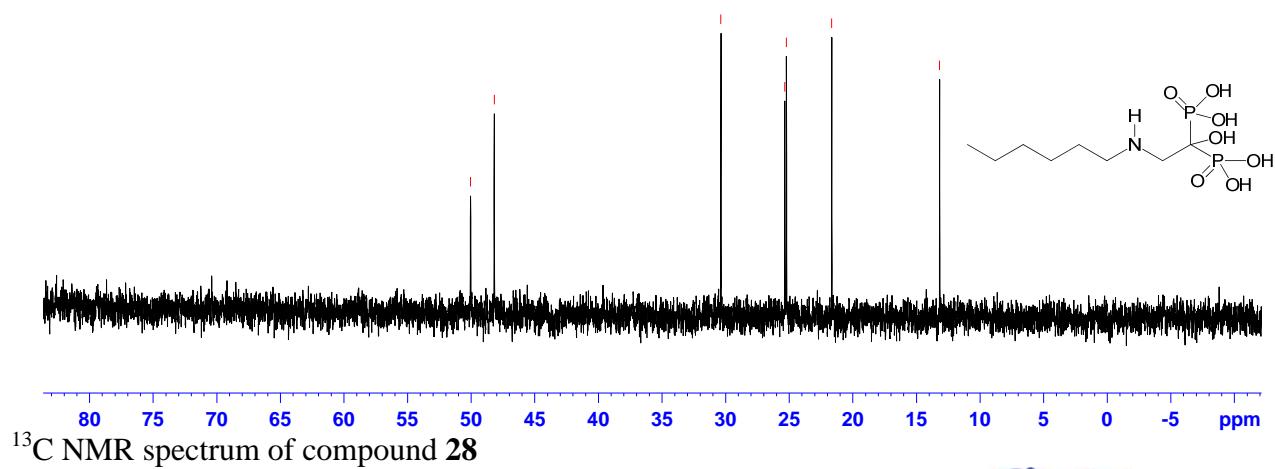

MFJB 21 /D2O/ 31P NMR

14.69

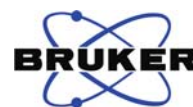

+//...//...//info

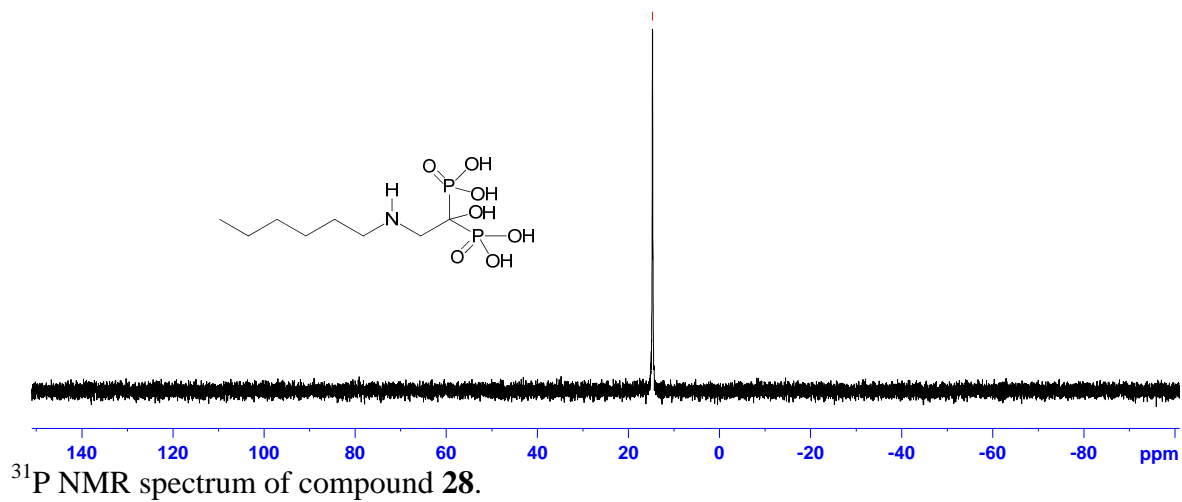

# MFJB 43 # //D2O// <sup>1</sup>H NMR 6/10/11.

# 2011-10-07 16:11:31 -0300 Administrator@JBR-01  
# TOPSPIN Multiplet Table  
# C:/Bruker/TopSpin3.0/examdata/MFJB43/1/pdata/1

1D TopSPIN Multiplet Table

| Number | Shift [ppm] | J [Hz]  | M | Connection | Identifier |
|--------|-------------|---------|---|------------|------------|
| 1      | 3.3896      | 11.7030 | 3 | J(1,0)     |            |
| 2      | 3.0116      | 7.5531  | 3 | J(2,0)     |            |
| 3      | 1.6007      | 7.4387  | 5 | J(3,0)     |            |
| 4      | 0.7534      | 6.9768  | 3 | J(4,0)     |            |

1D TopSPIN Multiplet Lines Table

| Number | Position [ppm] |
|--------|----------------|
| 1      | 3.4130         |
| 2      | 3.3897         |
| 3      | 3.1662         |
| 4      | 3.0267         |
| 5      | 3.0116         |
| 6      | 2.9965         |
| 7      | 1.6304         |
| 8      | 1.6158         |
| 9      | 1.6011         |
| 10     | 1.5860         |
| 11     | 1.5709         |
| 12     | 0.7673         |
| 13     | 0.7535         |
| 14     | 0.7394         |

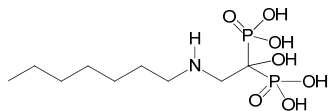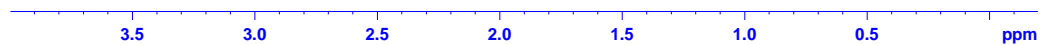

<sup>1</sup>H NMR spectrum of compound **29**.

MFJB\_17 /D2O/ <sup>13</sup>C NMR

71.39  
70.29  
69.20

49.85  
48.25

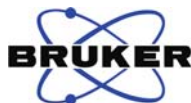

30.72  
27.79  
25.50  
25.34  
21.84

13.29

# 2012-04-19 16:45:06 -0300 Administrator@JBR-01

# TOPSPIN Multiplet Table  
# C:/Bruker/TopSpin3.0/examdata/MFJB17-19-04-12/31/pdata/1

1D TopSPIN Multiplet Table

| Number | Shift [ppm] | J [Hz]   | M | Connection | Identifier |
|--------|-------------|----------|---|------------|------------|
| 1      | 70.2917     | 137.6796 | 3 | J(1,0)     |            |

1D TopSPIN Multiplet Lines Table

| Number | Position [ppm] |
|--------|----------------|
| 1      | 71.3865        |
| 2      | 70.2937        |
| 3      | 69.1969        |

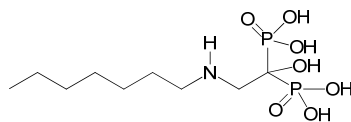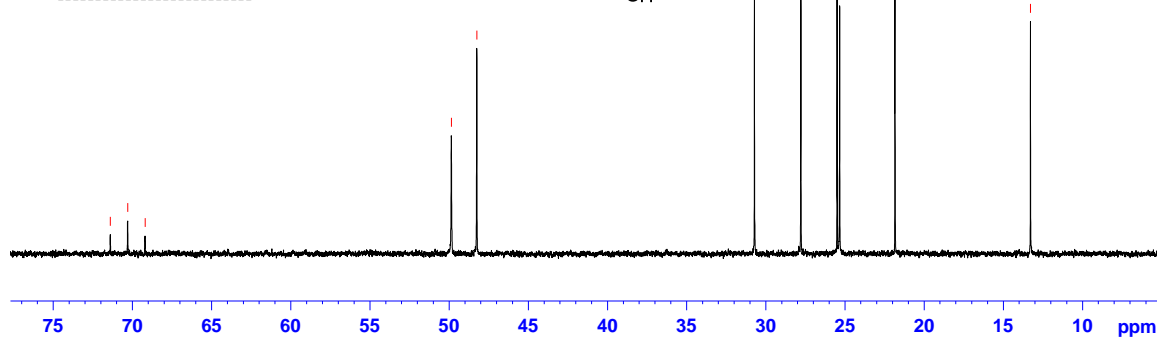

<sup>13</sup>C NMR spectrum of compound **29**.



#MFJB 43 #/D2O// , 31P\* 6/10/11.

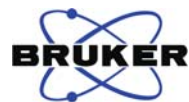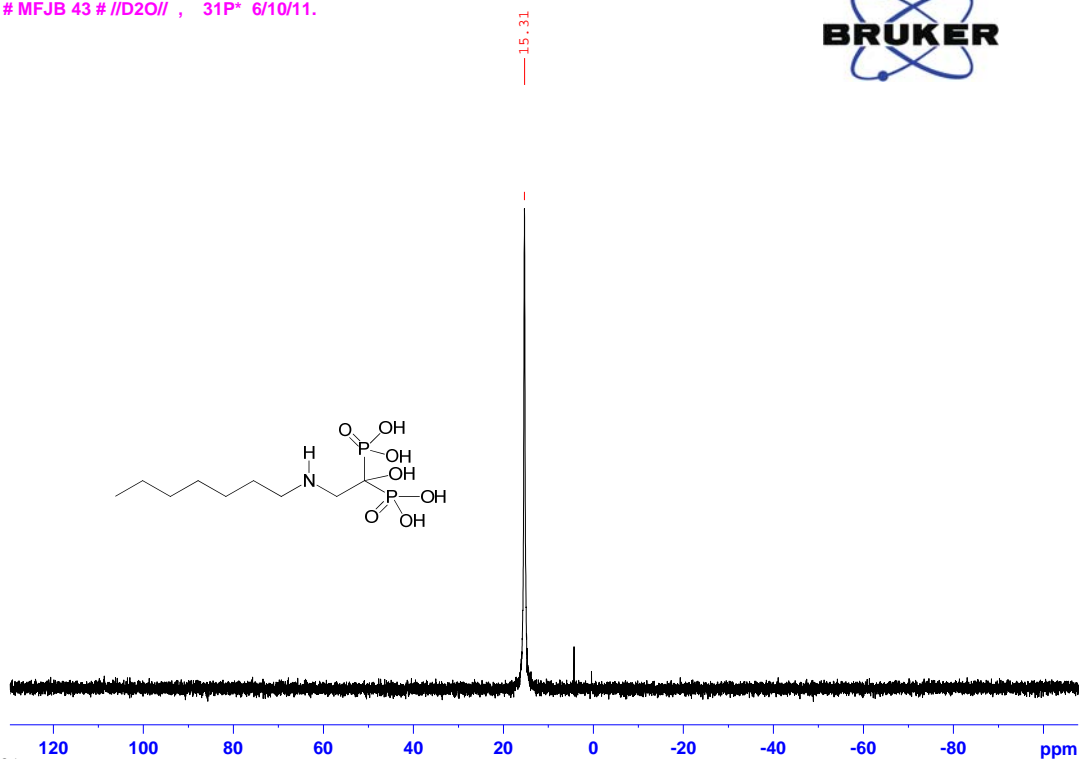

<sup>31</sup>P NMR spectrum of compound **29**.

MFJB43 10-06 / CD3OD / 1H NMR

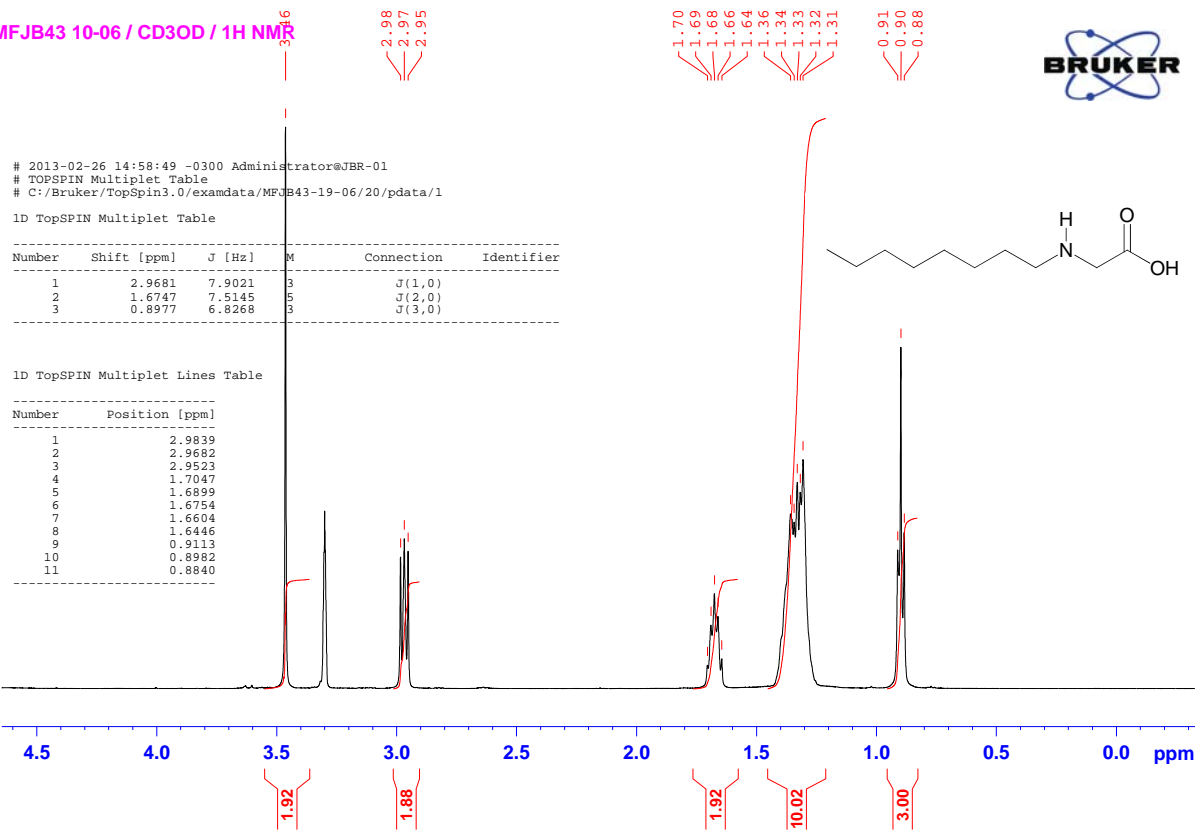

<sup>1</sup>H NMR spectrum of compound **25**.

MFJB43 19-06 / CD3OD / <sup>13</sup>C NMR

+//...//info

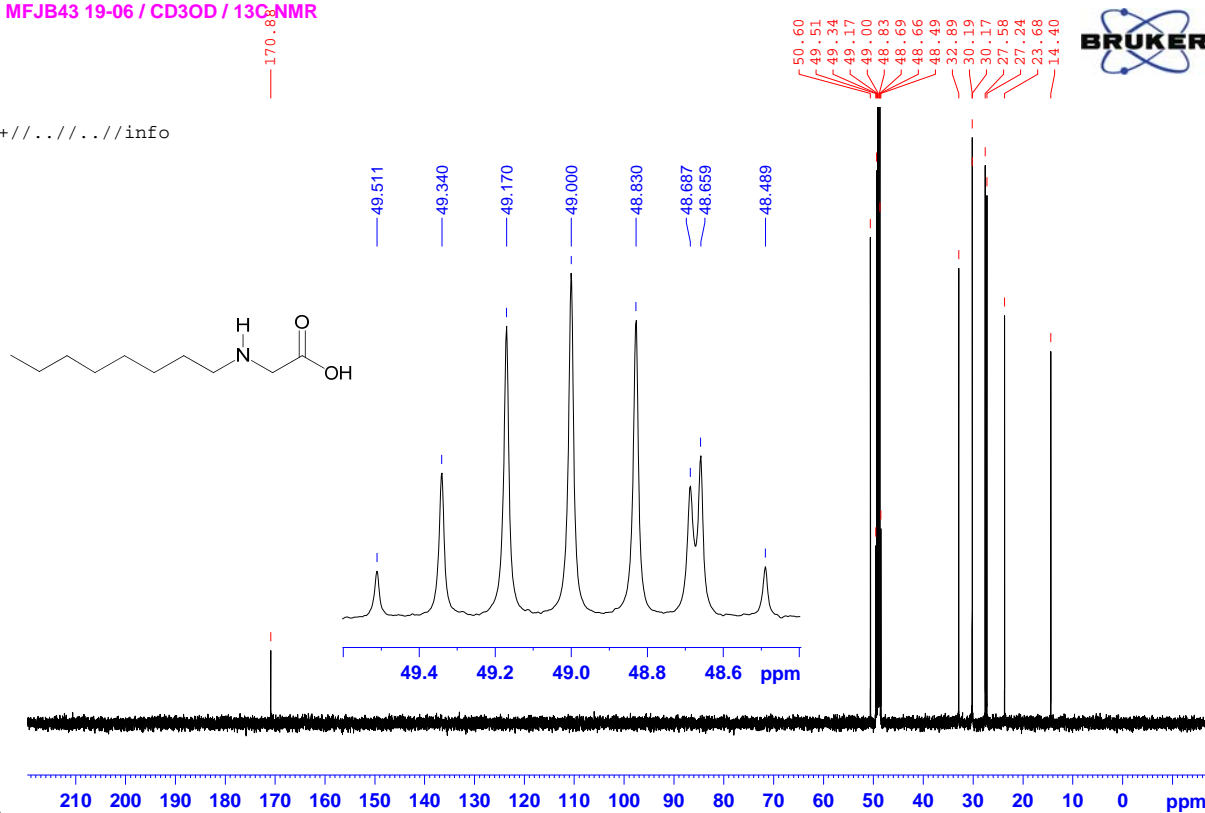

<sup>1</sup>H NMR spectrum of compound 25.

# MFJB54 #// <sup>1</sup>H NMR DMSO-d6

# 2012-10-11 15:14:04 -0300 Administrator@JBR-01  
# TOPSPIN Multiplet Table  
# C:/Bruker/TopSpin3.0/examdata/MFJB54/1/pdata/1

1D TopSPIN Multiplet Table

| Number | Shift [ppm] | J [Hz]  | M | Connection | I den |
|--------|-------------|---------|---|------------|-------|
| 1      | 3.2170      | 10.6528 | 3 | J(1,0)     |       |
| 2      | 2.8980      | 6.6662  | 3 | J(2,0)     |       |
| 3      | 1.5449      | 7.1018  | 3 | J(3,0)     |       |
| 4      | 0.8487      | 6.9018  | 3 | J(4,0)     |       |

1D TopSPIN Multiplet Lines Table

| Number | Position [ppm] |
|--------|----------------|
| 1      | 3.2383         |
| 2      | 3.2169         |
| 3      | 3.1957         |
| 4      | 2.9114         |
| 5      | 2.8988         |
| 6      | 2.8847         |
| 7      | 1.5591         |
| 8      | 1.5442         |
| 9      | 1.5307         |
| 10     | 0.8625         |
| 11     | 0.8491         |
| 12     | 0.8349         |

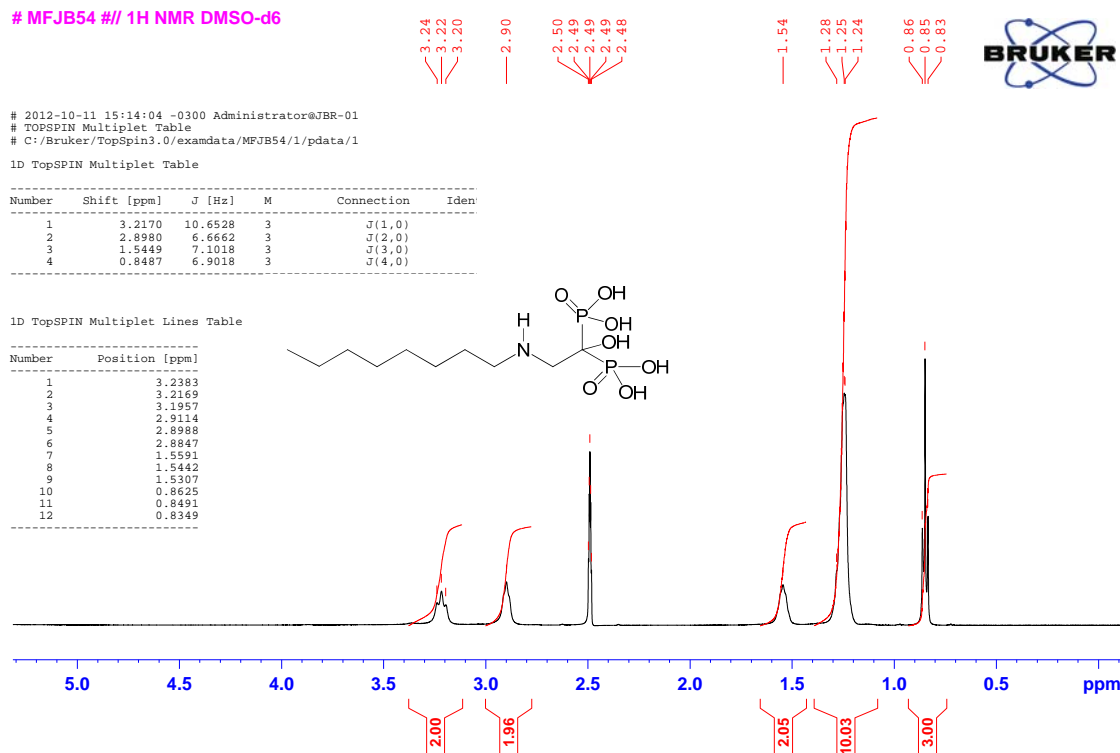

<sup>1</sup>H NMR spectrum of compound 30.

# MFJB54 #/<sup>13</sup>C NMR /DMSO-d6/

70.46  
69.34  
68.38

49.83  
47.35

40.00  
39.83  
39.67  
39.50  
39.33  
39.17  
39.00

31.14  
28.48  
28.46  
25.85  
25.58  
22.05

13.93

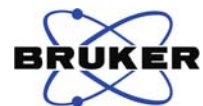

# 2012-10-11 09:57:25 -0300 Administrator@JBR-01  
# TOPSPIN Multiplet Table  
# C:/Bruker/TopSpin3.0/examdata/MFJB54/130/pdata/1

1D TopSPIN Multiplet Table

| Number | Shift [ppm] | J [Hz]   | M | Connection | Identifier |
|--------|-------------|----------|---|------------|------------|
| 1      | 69.3502     | 132.2910 | 3 | J(1,0)     |            |

1D TopSPIN Multiplet Lines Table

| Number | Position [ppm] |
|--------|----------------|
| 1      | 70.4021        |
| 2      | 69.3478        |
| 3      | 68.2982        |

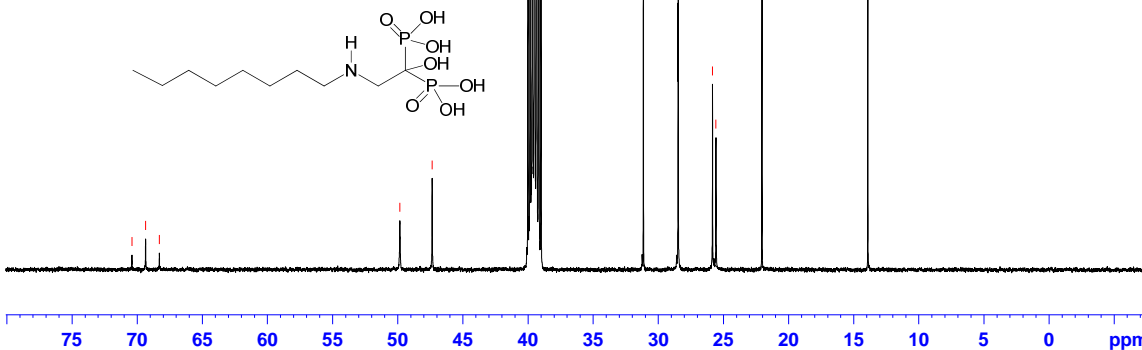

<sup>13</sup>C NMR spectrum of compound 30.

# MFJB54 #/<sup>31</sup>P NMR DMSO

14.85

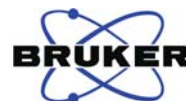

+//...//...//info

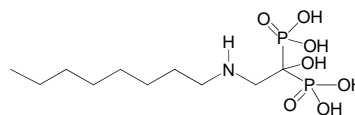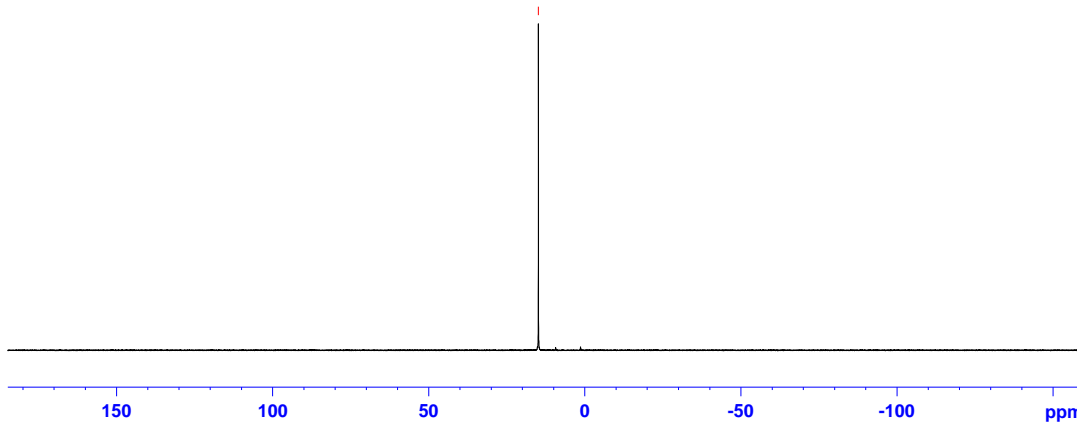

<sup>31</sup>P NMR spectrum of compound 30.

MFJB36 CD3OD 1H NMR

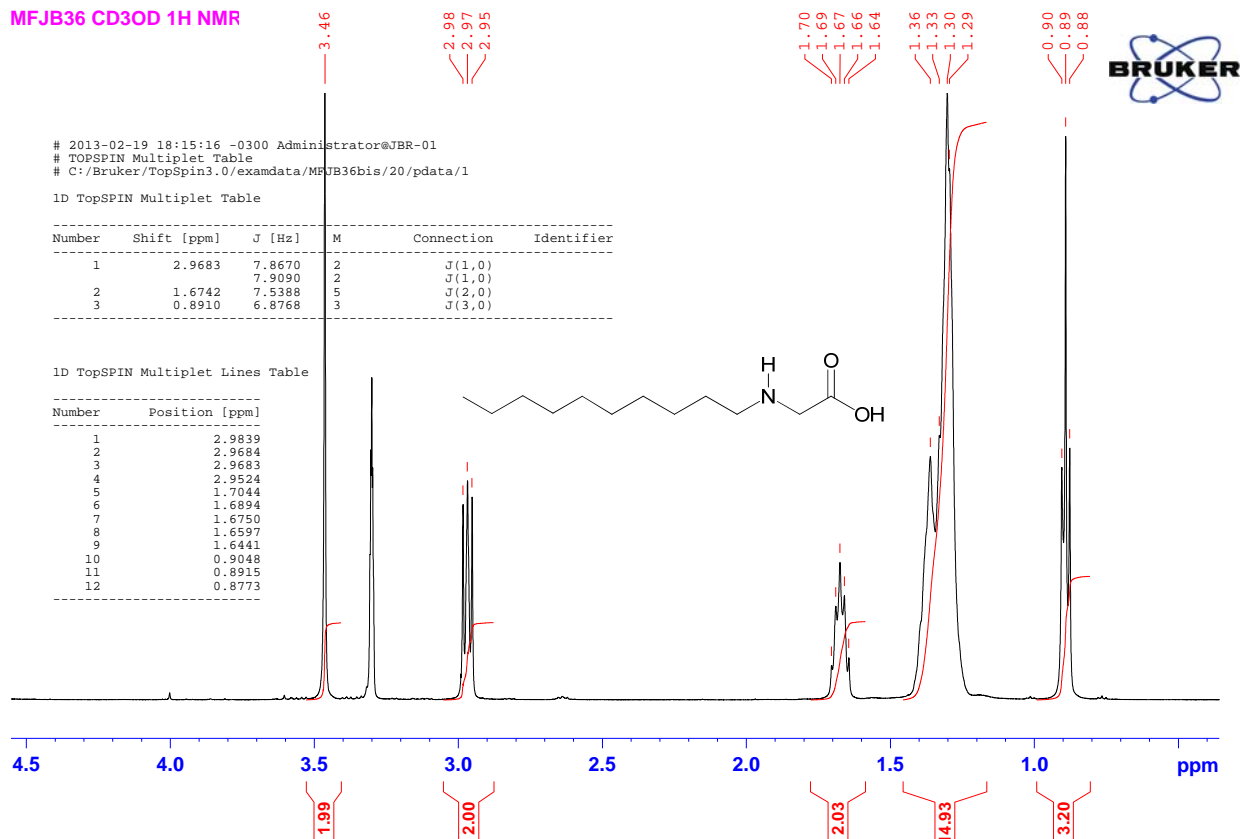

<sup>1</sup>H NMR spectrum of compound 26.

MFJB36 CD3OD 13 C NMR

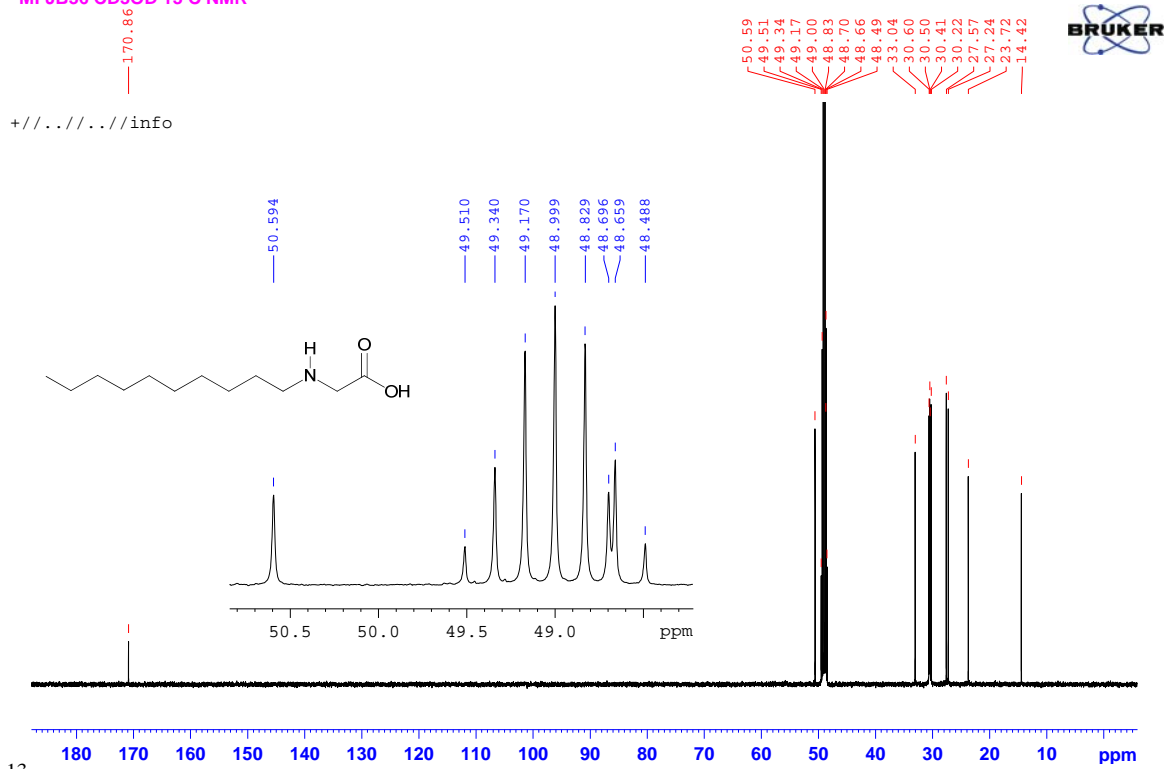

<sup>13</sup>C NMR spectrum of compound 26.

# MFJB 37 # <sup>1</sup>H NMR / DMSO-d<sub>6</sub>/

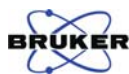

# 2012-10-12 14:20:48 -0300 Administrator@JBR-01  
# TOPSPIN Multiplet Table  
# C:/Bruker/TopSpin3.0/examdata/MFJB37-21-12-2012/130/pdata/1

1D TopSPIN Multiplet Table

| Number | Shift [ppm] | J [Hz]  | M | Connection | Identifier |
|--------|-------------|---------|---|------------|------------|
| 1      | 3.2027      | 11.2724 | 3 | J(1,0)     |            |
| 2      | 2.8985      | 7.5311  | 3 | J(2,0)     |            |
| 3      | 1.5425      | 6.9380  | 5 | J(3,0)     |            |
| 4      | 0.8452      | 6.7768  | 3 | J(4,0)     |            |

1D TopSPIN Multiplet Lines Table

| Number | Position [ppm] |
|--------|----------------|
| 1      | 3.2252         |
| 2      | 3.2045         |
| 3      | 3.1802         |
| 4      | 2.9136         |
| 5      | 2.8993         |
| 6      | 2.8835         |
| 7      | 1.5703         |
| 8      | 1.5535         |
| 9      | 1.5424         |
| 10     | 1.5276         |
| 11     | 1.5148         |
| 12     | 0.8587         |
| 13     | 0.8458         |
| 14     | 0.8316         |

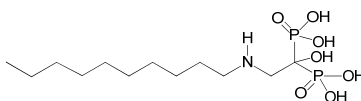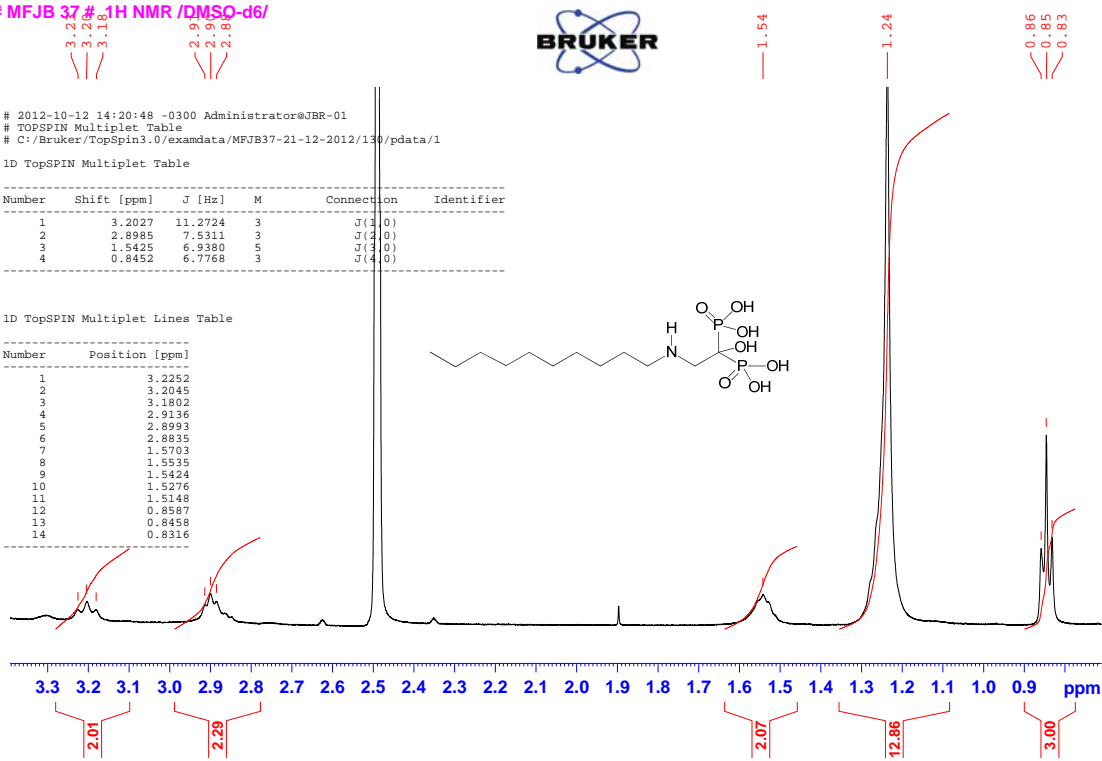

<sup>1</sup>H NMR spectrum of compound **31**.

MFJB37 // DMSO // <sup>13</sup>C NMR

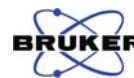

# 2013-06-11 14:54:49 -0300 Administrator@JBR-01  
# TOPSPIN Multiplet Table  
# C:/Bruker/TopSpin3.0/examdata/MFJB37-21-12-2012/21/pdata/1

1D TopSPIN Multiplet Table

| Number | Shift [ppm] | J [Hz]   | M | Connection | Identifier |
|--------|-------------|----------|---|------------|------------|
| 1      | 69.2427     | 129.9949 | 3 | J(1,0)     |            |

1D TopSPIN Multiplet Lines Table

| Number | Position [ppm] |
|--------|----------------|
| 1      | 70.2764        |
| 2      | 69.2427        |
| 3      | 68.2090        |

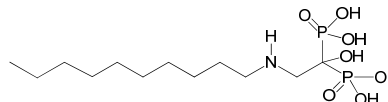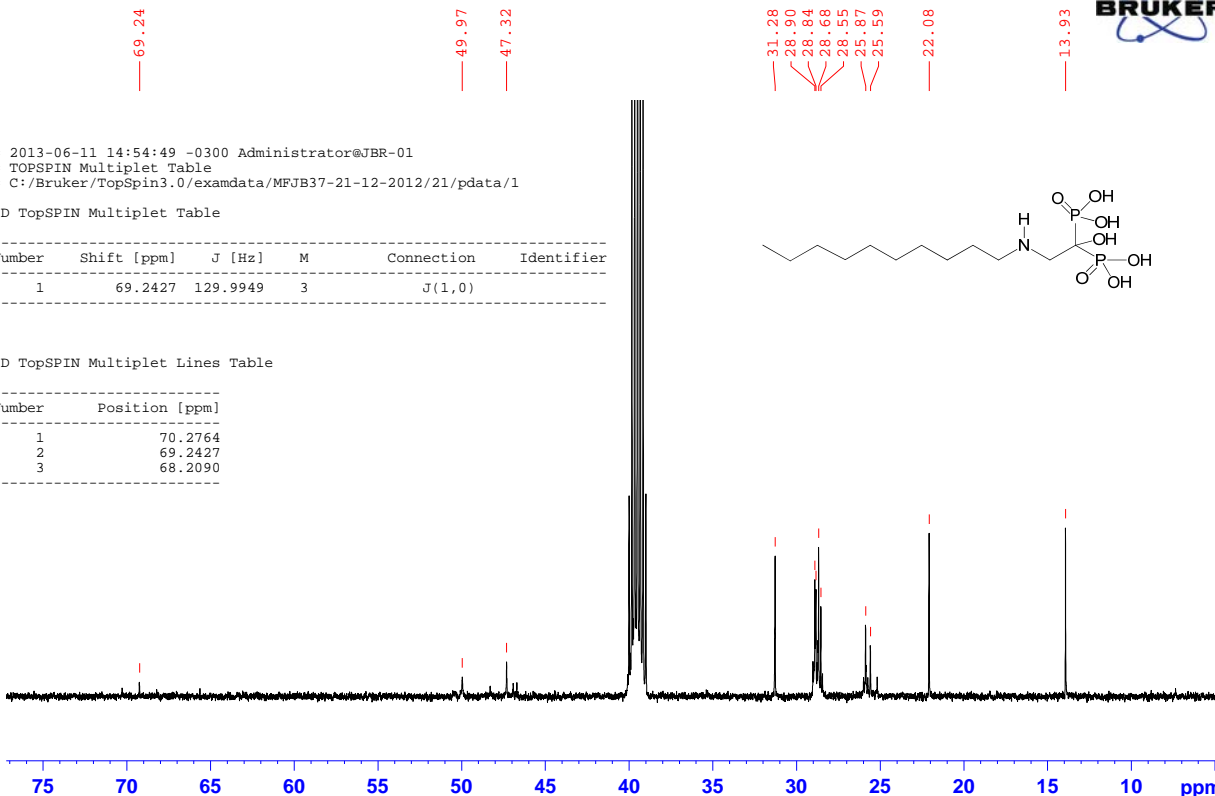

<sup>13</sup>C NMR spectrum of compound **31**.

MFJB37 - 31 P NMR DMSO-d6

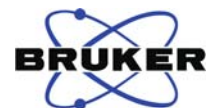

+//...//info

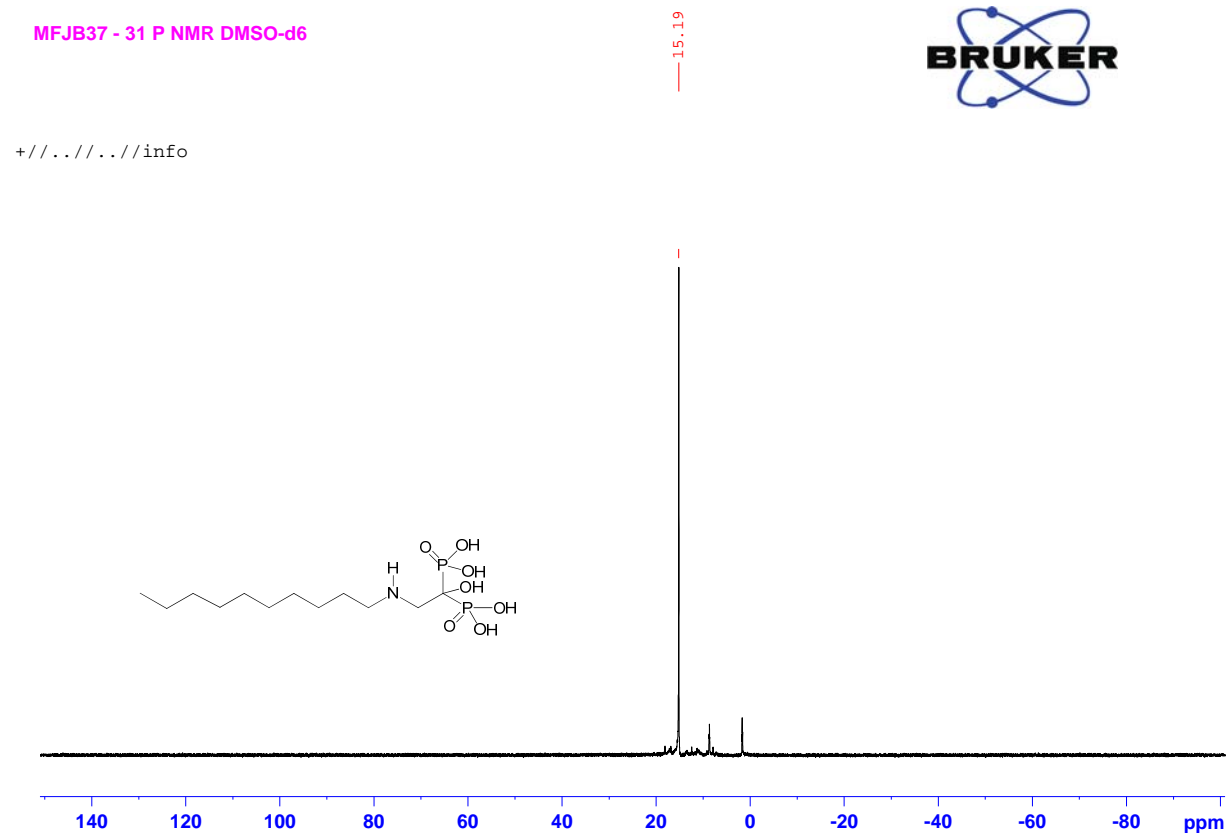

<sup>31</sup>P NMR spectrum of compound 31.

# MFJB 21bis # //DMSO-d6// 1H NMR

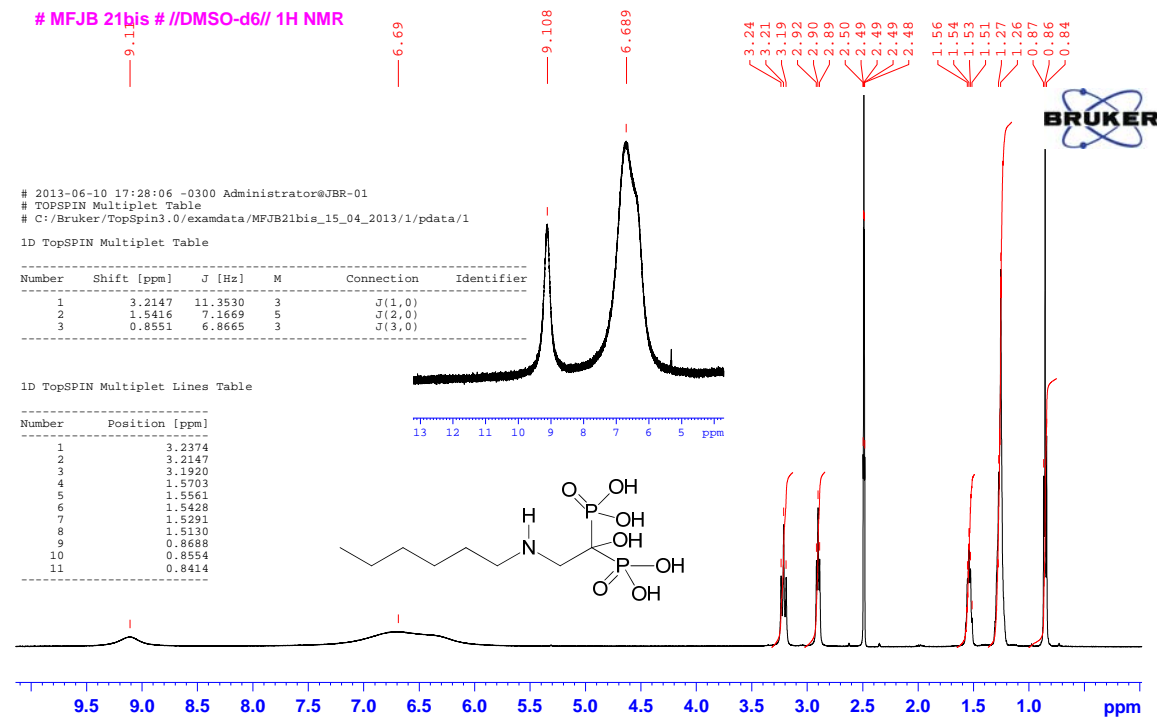

<sup>1</sup>H NMR spectrum of compound 28 in anhydrous DMSO-d<sub>6</sub>.

# MFJB 21 +Mg # //DMSO-d6// 1H NMR

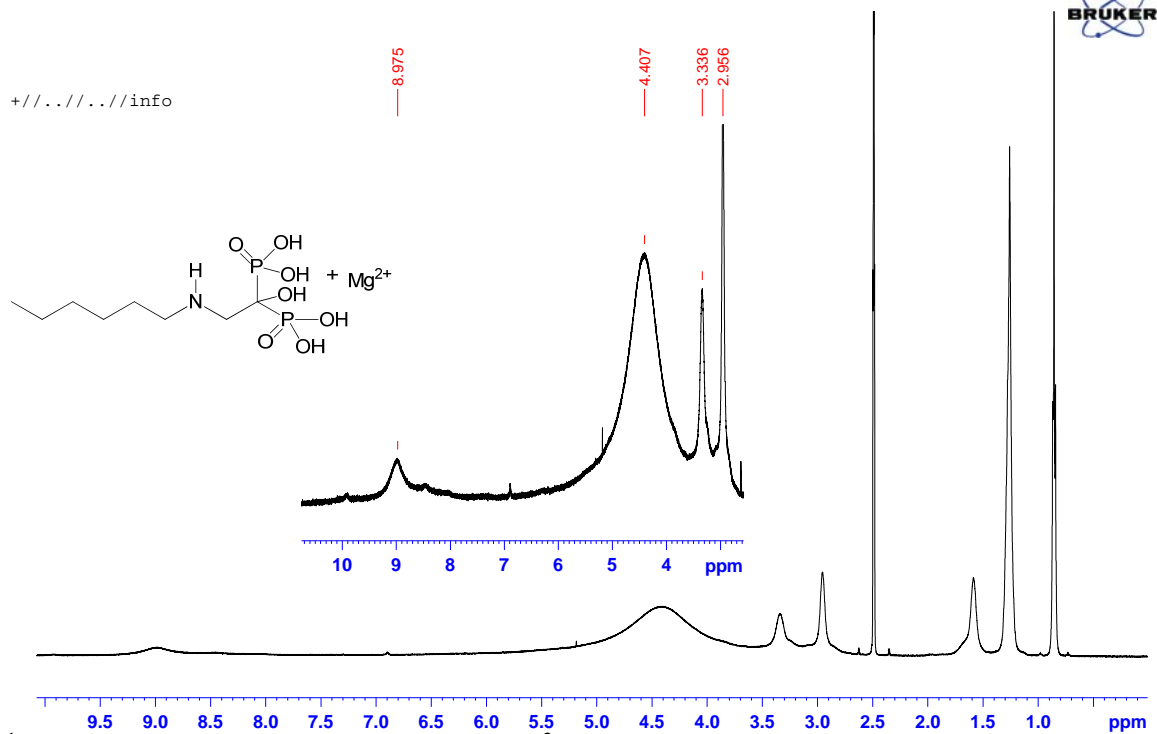

<sup>1</sup>H NMR spectrum of compound 28 + Mg<sup>2+</sup> in anhydrous DMSO-d<sub>6</sub>.

# BR25bis # //DMSO-d6// 1H NMR

# 2013-06-11 11:02:24 0300 Administrator@NMR-01  
# TOPSPIN Multiplet Table  
# C:/Bruker/TopSpin3.0/examdata/BR25bis\_15\_04\_2013/1/pdata/1

ID TopSPIN Multiplet Table

| Number | Shift [ppm] | J [Hz]  | M | Connection | Identifie |
|--------|-------------|---------|---|------------|-----------|
| 1      | 3.2001      | 7.3685  | 2 | J(1,0)     |           |
| 2      | 2.8900      | 13.3692 | 3 | J(1,0)     |           |
| 3      | 2.2440      | 6.8768  | 3 | J(2,0)     |           |
| 4      | 1.5770      | 6.5267  | 3 | J(3,0)     |           |
| 5      | 0.8997      | 19.7176 | 3 | J(3,0)     |           |
|        |             | 7.1319  | 6 | J(4,0)     |           |
|        |             | 7.4019  | 3 | J(5,0)     |           |

ID TopSPIN Multiplet Lines Table

| Number | Position [ppm] |
|--------|----------------|
| 1      | 3.2243         |
| 2      | 3.2193         |
| 3      | 3.2071         |
| 4      | 3.1934         |
| 5      | 3.1811         |
| 6      | 3.1656         |
| 7      | 2.9037         |
| 8      | 2.8921         |
| 9      | 2.8762         |
| 10     | 2.2189         |
| 11     | 2.2035         |
| 12     | 2.1903         |
| 13     | 2.2578         |
| 14     | 2.2453         |
| 15     | 2.2370         |
| 16     | 2.2979         |
| 17     | 2.2867         |
| 18     | 2.2690         |
| 19     | 1.6126         |
| 20     | 1.5988         |
| 21     | 1.5848         |
| 22     | 1.5696         |
| 23     | 1.5552         |
| 24     | 1.5413         |
| 25     | 0.9145         |
| 26     | 0.8998         |
| 27     | 0.8849         |

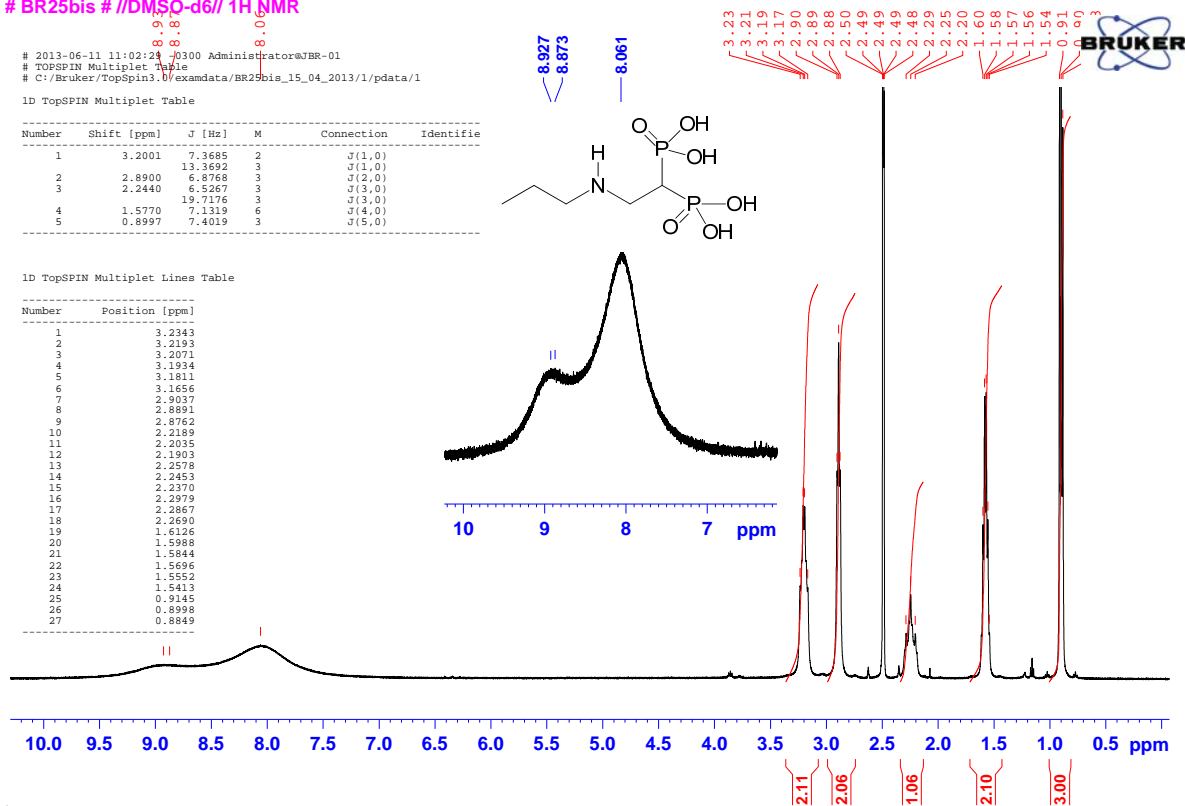

<sup>1</sup>H NMR spectrum of compound 33 in anhydrous DMSO-d<sub>6</sub>.

# BR25 +Mg # DMSO-d6// 1H NMR

# 2013-06-11 11:50:07 -0300 Administrator@BR-01  
 # TOPSPIN Multiplet Table  
 # C:/Bruker/TopSpin3.0/examdata/BR25plusMg\_15\_04\_2013/1/pdata/1  
 ID TopSPIN Multiplet Table

| Number | Shift [ppm] | J [Hz] | M | Connection | Identifier |
|--------|-------------|--------|---|------------|------------|
| 1      | 2.9184      | 6.1226 | 3 | J(1,0)     |            |
| 2      | 1.6043      | 7.1182 | 6 | J(2,0)     |            |
| 3      | 0.9038      | 7.4019 | 3 | J(3,0)     |            |

ID TopSPIN Multiplet Lines Table

| Number | Position [ppm] |
|--------|----------------|
| 1      | 2.9306         |
| 2      | 2.9192         |
| 3      | 2.9061         |
| 4      | 1.6398         |
| 5      | 1.6273         |
| 6      | 1.6135         |
| 7      | 1.5993         |
| 8      | 1.5855         |
| 9      | 1.5687         |
| 10     | 0.9186         |
| 11     | 0.9039         |
| 12     | 0.8890         |

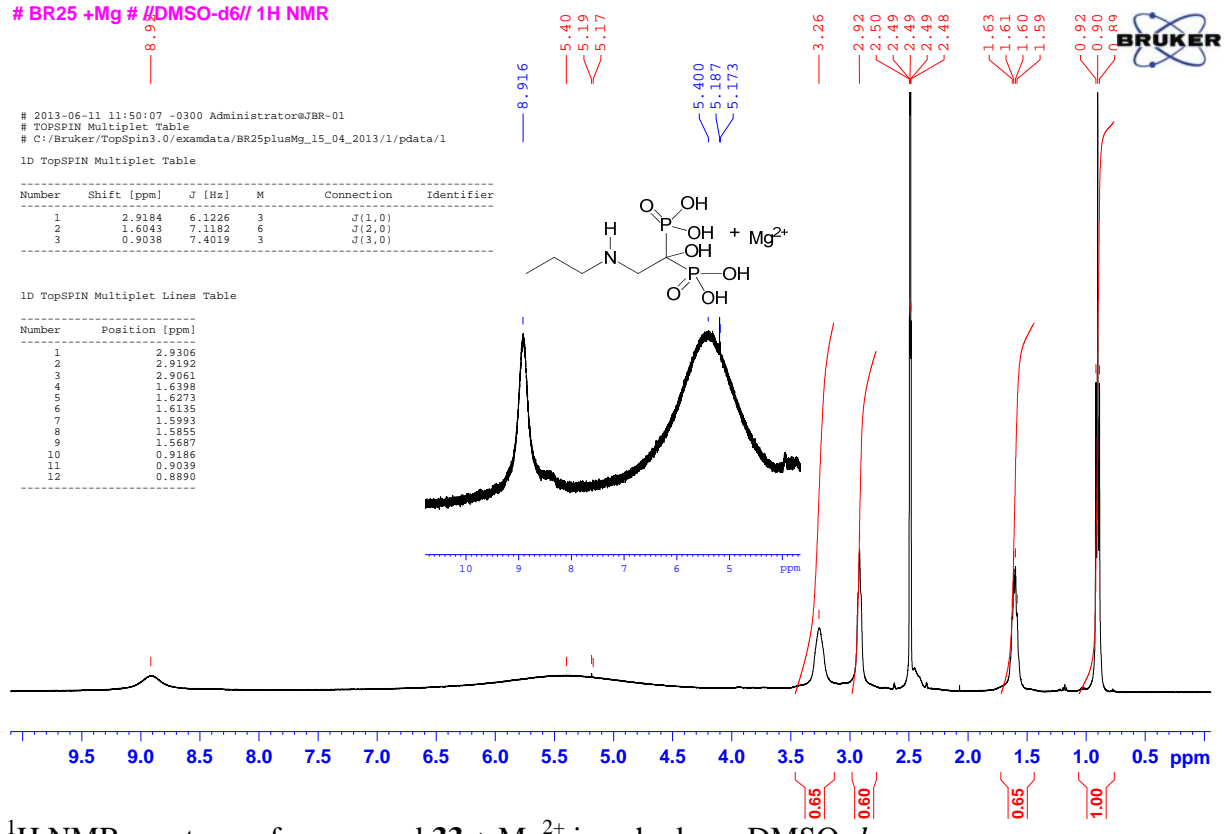

<sup>1</sup>H NMR spectrum of compound **33** + Mg<sup>2+</sup> in anhydrous DMSO-d<sub>6</sub>.



**Table 2.** Cartesian coordinates of compounds **12a** and **27a**, as calculated by B3LYP/6-311+G(d,p) with SCRF=PCM (water)

### Compound 12a

Charge= 0

Conformer 1

Energy: -1509.2521684 H

|    |           |           |           |
|----|-----------|-----------|-----------|
| C  | -0.334544 | 0.346275  | -0.480262 |
| C  | -1.700473 | 0.987886  | -0.164000 |
| N  | -2.805636 | 0.148107  | -0.676680 |
| P  | 1.103209  | 1.408278  | 0.003429  |
| P  | -0.148401 | -1.322221 | 0.312363  |
| O  | 1.011953  | 1.434752  | 1.632389  |
| O  | 1.007123  | 2.812329  | -0.515676 |
| O  | 2.364375  | 0.604824  | -0.402304 |
| O  | 0.024996  | -1.118621 | 1.808830  |
| O  | 1.005071  | -2.078731 | -0.387974 |
| O  | -1.517988 | -2.082862 | -0.057958 |
| H  | -0.243700 | 0.209646  | -1.563621 |
| H  | -1.830339 | 1.076733  | 0.917430  |
| H  | -1.739328 | 1.999558  | -0.583254 |
| C  | -4.127763 | 0.579924  | -0.197134 |
| H  | -2.797702 | 0.188798  | -1.693442 |
| Mg | 2.718612  | -1.255415 | -0.843654 |
| H  | -2.218639 | -1.374659 | -0.285484 |
| H  | 0.750368  | 0.541381  | 1.966334  |
| H  | -4.897771 | -0.030234 | -0.671096 |
| H  | -4.329945 | 1.635879  | -0.416329 |
| H  | -4.186506 | 0.432238  | 0.883114  |

Conformer 2

Energy: -1509.2512462 H

|   |           |           |           |
|---|-----------|-----------|-----------|
| C | 0.215972  | 0.530842  | -0.591900 |
| C | 1.290829  | 1.256058  | 0.241465  |
| N | 2.641140  | 0.903155  | -0.251716 |
| P | 0.368476  | -1.312564 | -0.478481 |
| P | -1.523014 | 1.041890  | -0.216187 |
| O | 0.204285  | -1.707452 | 1.013034  |
| O | 1.897407  | -1.589231 | -0.909727 |
| O | -0.610514 | -1.955491 | -1.438633 |
| O | -2.358888 | 0.242355  | -1.370823 |
| O | -1.754139 | 2.515181  | -0.375053 |
| O | -1.895820 | 0.435109  | 1.159774  |
| H | 0.358994  | 0.785064  | -1.648238 |
| H | 1.123063  | 2.338875  | 0.211046  |
| H | 1.232466  | 0.945259  | 1.287139  |
| H | 2.786261  | 1.365209  | -1.146428 |
| C | 3.718958  | 1.302067  | 0.666128  |

|    |           |           |           |
|----|-----------|-----------|-----------|
| H  | 2.429022  | -0.759618 | -0.665494 |
| H  | -1.983050 | -0.656022 | -1.517489 |
| Mg | -1.194980 | -1.042752 | 2.202257  |
| H  | 4.681976  | 1.090163  | 0.199407  |
| H  | 3.646341  | 0.717110  | 1.585412  |
| H  | 3.681572  | 2.367443  | 0.926847  |

Conformer 3

Energy: -1509.2419860 H

|    |           |           |           |
|----|-----------|-----------|-----------|
| C  | 0.505819  | 0.328366  | -0.171611 |
| C  | 1.772737  | 0.926491  | 0.516650  |
| N  | 3.055409  | 0.414415  | 0.039912  |
| P  | 0.266002  | -1.464751 | 0.237374  |
| P  | -1.044638 | 1.241301  | 0.234627  |
| O  | -0.966267 | -1.949418 | -0.566805 |
| O  | -0.128430 | -1.434762 | 1.823099  |
| O  | 1.525058  | -2.268361 | 0.072942  |
| O  | -0.741581 | 2.822389  | -0.025344 |
| O  | -1.346295 | 1.056471  | 1.704177  |
| O  | -2.129660 | 0.818016  | -0.780240 |
| Mg | -2.484602 | -1.025036 | -1.353296 |
| H  | 0.619889  | 0.380295  | -1.258864 |
| H  | 1.768222  | 2.010391  | 0.374442  |
| H  | 1.707359  | 0.747389  | 1.592835  |
| H  | 3.038654  | -0.601216 | 0.088807  |
| C  | 3.419667  | 0.836084  | -1.313241 |
| H  | -0.675983 | -0.641796 | 2.030908  |
| H  | -0.854511 | 3.083860  | -0.948812 |
| H  | 4.394526  | 0.414638  | -1.568581 |
| H  | 3.507296  | 1.925952  | -1.346277 |
| H  | 2.709496  | 0.531432  | -2.097727 |

Conformer 4

Energy: -1509.2388717 H

|   |           |           |           |
|---|-----------|-----------|-----------|
| C | -0.391115 | 0.244051  | -0.324914 |
| C | -1.788607 | 0.722828  | 0.127969  |
| N | -2.850289 | 0.169758  | -0.712582 |
| P | 0.931823  | 1.429693  | 0.192976  |
| P | -0.081547 | -1.535885 | 0.080950  |
| O | 0.817858  | 1.851494  | 1.630765  |
| O | 0.645737  | 2.716599  | -0.795360 |
| O | 2.280988  | 0.880570  | -0.307632 |
| O | 0.052416  | -1.603656 | 1.718219  |
| O | 1.323483  | -1.917704 | -0.417480 |
| O | -1.241272 | -2.374130 | -0.385601 |
| H | -0.369444 | 0.271906  | -1.420985 |
| H | -1.931205 | 0.490447  | 1.196386  |
| H | -1.837648 | 1.813236  | 0.045431  |
| H | -2.772578 | -0.844544 | -0.697814 |
| C | -4.181896 | 0.575828  | -0.264593 |

|    |           |           |           |
|----|-----------|-----------|-----------|
| H  | 0.251007  | 3.454105  | -0.313956 |
| H  | -0.791700 | -1.780114 | 2.152272  |
| Mg | 2.950774  | -0.896462 | -0.698556 |
| H  | -4.938909 | 0.092505  | -0.885909 |
| H  | -4.296881 | 1.658358  | -0.376540 |
| H  | -4.388005 | 0.324588  | 0.788913  |

### Compound 27a

Charge= -1

Conformer 1

Energy: -1584.0230468 H

|    |           |           |           |
|----|-----------|-----------|-----------|
| C  | 0.396725  | 0.270074  | -0.278165 |
| C  | 1.766716  | 0.735120  | 0.262210  |
| N  | 2.836759  | 0.067745  | -0.489066 |
| P  | 0.034652  | -1.487390 | 0.286516  |
| P  | -0.997392 | 1.437601  | 0.278887  |
| O  | -1.312452 | -1.909819 | -0.364202 |
| O  | -0.197755 | -1.319746 | 1.886564  |
| O  | 1.187295  | -2.432061 | 0.041173  |
| O  | -0.581134 | 2.875507  | 0.009094  |
| O  | -1.217132 | 1.064856  | 1.767976  |
| O  | -2.236902 | 1.005853  | -0.598276 |
| Mg | -2.749904 | -0.795600 | -1.036748 |
| O  | 0.457380  | 0.282308  | -1.715806 |
| H  | 1.856313  | 1.811398  | 0.089534  |
| H  | 1.827073  | 0.565545  | 1.346037  |
| H  | 2.818954  | -0.925344 | -0.265967 |
| C  | 4.165704  | 0.625643  | -0.242833 |
| H  | -0.660767 | -0.431057 | 2.034064  |
| H  | 1.406989  | 0.146399  | -1.904827 |
| H  | 4.907756  | 0.062430  | -0.813068 |
| H  | 4.458683  | 0.604853  | 0.818203  |
| H  | 4.198359  | 1.665386  | -0.580046 |

Conformer 2

Energy: -1584.0202747 H

|   |           |           |           |
|---|-----------|-----------|-----------|
| C | 0.303676  | -0.342938 | -0.288856 |
| C | 1.629815  | -0.947481 | 0.211290  |
| N | 2.785676  | -0.253612 | -0.394306 |
| P | -1.176440 | -1.439421 | 0.223795  |
| P | 0.187548  | 1.431947  | 0.282526  |
| O | -0.929415 | -2.027796 | 1.606646  |
| O | -1.220589 | -2.424455 | -0.960483 |
| O | -2.437810 | -0.491159 | 0.205368  |
| O | 0.271077  | 1.505471  | 1.788575  |
| O | -1.040777 | 2.124441  | -0.364590 |
| O | 1.482976  | 2.125489  | -0.425793 |
| O | 0.310305  | -0.347797 | -1.736563 |

|    |           |           |           |
|----|-----------|-----------|-----------|
| Mg | -2.796313 | 1.289537  | -0.389620 |
| H  | 1.693565  | -0.845056 | 1.295590  |
| H  | 1.648436  | -2.020937 | -0.023209 |
| C  | 4.071860  | -0.689349 | 0.161333  |
| H  | 2.767323  | -0.446623 | -1.392316 |
| H  | 2.207720  | 1.430744  | -0.421945 |
| H  | -0.181058 | -1.165855 | -1.958478 |
| H  | 4.885416  | -0.206576 | -0.383293 |
| H  | 4.212662  | -1.778103 | 0.106566  |
| H  | 4.137097  | -0.389590 | 1.209989  |

Conformer 3

Energy: -1584.0196418 H

|    |           |           |           |
|----|-----------|-----------|-----------|
| C  | 0.242957  | -0.468839 | 0.426058  |
| C  | 1.269162  | -1.039410 | -0.563616 |
| N  | 2.659591  | -0.722149 | -0.169050 |
| P  | 0.344734  | 1.412576  | 0.487096  |
| P  | -1.516774 | -1.159157 | 0.068793  |
| O  | -0.111864 | 1.955173  | -0.901896 |
| O  | 1.941770  | 1.697536  | 0.597785  |
| O  | -0.362756 | 2.012741  | 1.676269  |
| O  | -2.105457 | -1.215582 | 1.488623  |
| O  | -1.356142 | -2.500376 | -0.642793 |
| O  | -2.262269 | -0.114832 | -0.843940 |
| O  | 0.583404  | -0.966891 | 1.738694  |
| Mg | -1.796326 | 1.504924  | -1.737258 |
| H  | 1.113021  | -2.120662 | -0.638840 |
| H  | 1.097381  | -0.611907 | -1.555474 |
| H  | 2.849206  | -1.201515 | 0.707297  |
| C  | 3.647876  | -1.138799 | -1.171743 |
| H  | 2.442893  | 0.875478  | 0.270536  |
| H  | -0.285121 | -1.101191 | 2.167566  |
| H  | 4.653096  | -0.953160 | -0.789598 |
| H  | 3.512827  | -0.550044 | -2.082085 |
| H  | 3.562611  | -2.202181 | -1.433409 |

Conformer 4

Energy: -1584.0171791 H

|    |           |           |           |
|----|-----------|-----------|-----------|
| C  | 0.356424  | 0.276183  | -0.400729 |
| C  | 1.736185  | 0.846605  | -0.013982 |
| N  | 2.869745  | 0.112917  | -0.580927 |
| P  | 0.125496  | -1.465523 | 0.257137  |
| P  | -1.016466 | 1.416111  | 0.288822  |
| O  | -1.256004 | -1.962489 | -0.243761 |
| O  | 0.045051  | -1.209559 | 1.857338  |
| O  | 1.280357  | -2.388568 | -0.044092 |
| O  | -0.699914 | 2.828700  | -0.184052 |
| O  | -1.001798 | 1.173977  | 1.818314  |
| O  | -2.348405 | 0.872157  | -0.354925 |
| Mg | -2.806024 | -0.938999 | -0.798478 |

|   |           |           |           |
|---|-----------|-----------|-----------|
| O | 0.208771  | 0.179693  | -1.832583 |
| H | 1.782396  | 1.880860  | -0.373112 |
| H | 1.785637  | 0.899002  | 1.086568  |
| H | 2.763001  | -0.874438 | -0.359977 |
| C | 4.150652  | 0.605840  | -0.082784 |
| H | -0.405305 | -0.318160 | 2.028873  |
| H | 0.237109  | 1.079858  | -2.182805 |
| H | 4.960953  | -0.007505 | -0.484350 |
| H | 4.228822  | 0.601050  | 1.018171  |
| H | 4.311975  | 1.635028  | -0.419471 |

Conformer 5

Energy: -1584.0153643 H

|    |           |           |           |
|----|-----------|-----------|-----------|
| C  | -0.327937 | -0.359258 | -0.554796 |
| C  | -1.458730 | -0.945915 | 0.310738  |
| N  | -2.753048 | -0.286285 | 0.145289  |
| P  | -0.028242 | 1.519050  | -0.412546 |
| P  | 1.256190  | -1.256674 | -0.094290 |
| O  | -0.069393 | 1.828550  | 1.129921  |
| O  | -1.126065 | 2.181292  | -1.235688 |
| O  | 1.405510  | 1.742511  | -0.962749 |
| O  | 2.363463  | -0.633638 | -1.097920 |
| O  | 1.194917  | -2.750362 | -0.272803 |
| O  | 1.570053  | -0.767824 | 1.353535  |
| O  | -0.622104 | -0.618244 | -1.947918 |
| Mg | 1.144637  | 0.872318  | 2.304205  |
| H  | -1.524104 | -2.017986 | 0.054906  |
| H  | -1.182680 | -0.893485 | 1.367643  |
| H  | -2.948271 | -0.187475 | -0.845730 |
| C  | -3.837427 | -1.036344 | 0.777124  |
| H  | 2.171067  | 0.361706  | -1.145638 |
| H  | -0.995829 | 0.206219  | -2.297356 |
| H  | -4.790888 | -0.543222 | 0.574809  |
| H  | -3.691507 | -1.051601 | 1.861558  |
| H  | -3.907786 | -2.082795 | 0.435433  |
